# Supplementary material for: Evaluation of UVC Excimer Lamp (222 nm) Efficacy for Coronavirus Inactivation in an Animal Model
Source: MDPI journal article supplement (doi:10.3390/v14092038), 2022-09-14
Supplement: s1 [file s1]

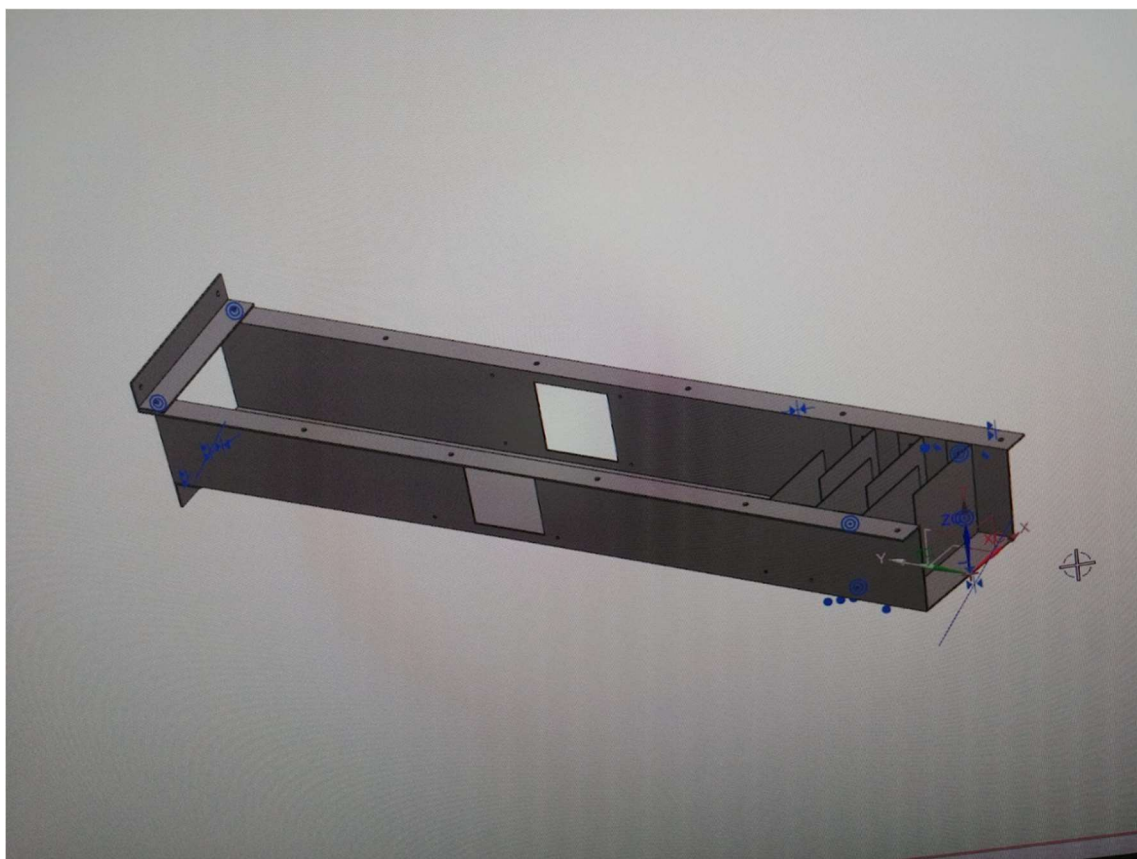

**Figure S1.** Rendering of the aluminum tunnel constituting the irradiation chamber.

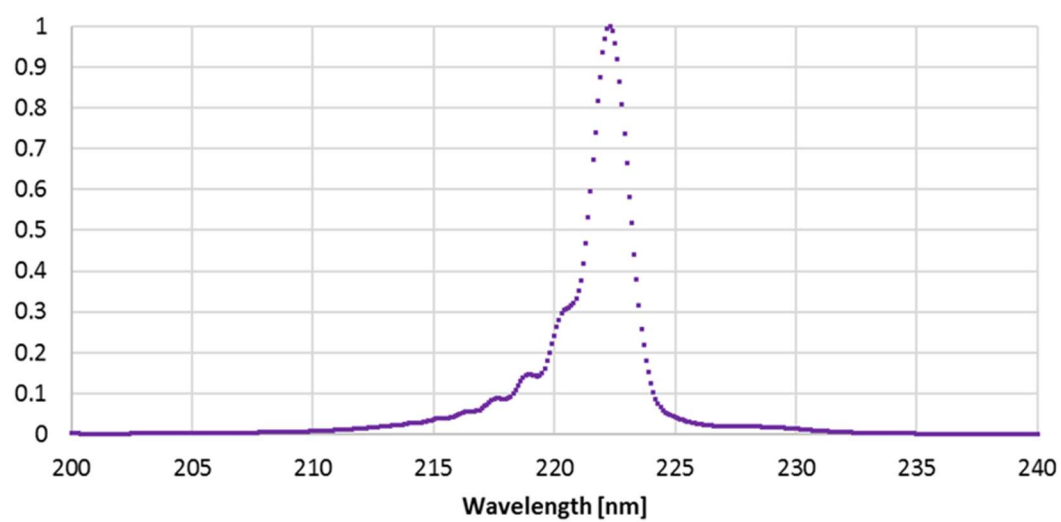

**Figure S2.** Emission spectrum of the Ushio lamps showing the 222 nm peak.
